# Supplementary material
Source: publisher site journal article supplement (https://www.dovepress.com/article/353434)
Supplement: Supplementary file 1 [file get_supplementary_file.php]

**Appendix One: Topic Guides for interviews**

**CFHealthHub RCT – Qualitative Interview Study**

**Patient Topic guide**

*We’re interested in your experiences of the service that you have received from CFHealthHub including both the meetings to discuss your nebuliser medication and the website/app you have used.*

1. Why did you decide to take part in the research?

2. How did you find being asked to take part in the trial? [Prompts: recruitment, paperwork volume, information provided, questionnaires]

**Now I’d like to ask you about your meetings with the person who has been working with you on CFHealthHub.**

3. What types of things did they recommend that you do? [prompts: setting goals, solving problems, making plans (myplan), giving you information]

4. Do you think you have had any benefit from these meetings?

**If yes**, what benefit and what about the service helped you to get this?

**If no**, what has stopped you gaining benefit?

5. What was good about how the meetings were delivered? [Prompt: what needs to be improved?]

**Now I’d like to talk to you about the CFHealthHub website / app.**

6. How have you accessed CFHH? [Prompts: laptop, app, mobile version of website, desktop.

- Which of these do you prefer?

- Why do you prefer it [Prompts: why not the others]

7. What was good about the website? [Prompts: my plan, how am I doing, tool kit, graphs, my treatment]

8. What needs to be improved? [Prompts: my plan, how am I doing, tool kit, graphs, my treatment]

9. Do you think you’ve had any benefit from using the website?

**If yes**, what benefit and what about the website helped you to get this?

**If no**, what has stopped you gaining benefit?

10. Have the website and/or meetings helped you to improve how often you use your nebuliser?

**If yes**, how has it helped you to do this?

**If not**, why not?

11. How do the CFHealthHub website and the meetings work together?

12. Has using CFHealthHub helped you to be able to use your nebuliser any better? Why / Why not? [Prompt: capability skills / knowledge including beliefs]

13. Has using CFHealthHub helped you to find the time to use your nebuliser more? Why / why not? [Prompt: opportunity / making plans]

14. Has using CFHealthHub made you want to use your nebuliser more? Why / why not? [Prompt: motivation and confidence]

15. How does the CFHealthHub service (website and meetings) fit with the care you were already receiving at the unit/hospital?

16. Do you think you would continue using CFHealthHub? [Prompt: during the study / after the study]

17. Is CFHealthHub a good thing to use in general for people with CF? Why? / Why not?

18. How have you found being part of the study?

*Is there anything else that we haven’t talked about that you’d like to comment on?*

**Interventionist Topic guide**

Introduction to the interview: Interested in how you’ve found using CFHealthhub (CFHH) with your participants and any learning from it:

The trial

1. What works or could be improved about:

a) recruiting patients to the trial?

b) collecting data?

c) any other aspect?

The intervention:

Now I’d like to go through each of the steps for providing the intervention to get your views on each of these:

2. What works or could be improved about:

a) how you have assessed participants’ adherence levels prior to using CFHH?

b) how you set up appointments with your participants?

c) intervention visit 1? [Prompts: gathering data, introducing the nebuliser, entering prescription data into CFHH, completion of screening tools, patient feedback, anything else]

d) review visit 1? [Prompts: reviewing adherence data, introducing CFHH, explaining modules, setting goals, action planning, identifying suitable tailored content, technical issues, anything else]

e) other review visits? [Prompts: reviewing goals, reviewing adherence plans, motivation, problem solving, anything else]

3. What works or could be improved about the training manuals and training sessions?

4. What works or could be improved about the support available from the research team? [Prompts: timing, availability, problem solving].

[Specific prompt for MDT senior interventionist: do you think the training has equipped you to deliver this intervention in your centre yourself after the trial ends? If no, what further training would be needed?]

5. How has the CFHH intervention been received by the rest of the team? [Prompt: how has your communication been with the rest of the team about CFHH?]

6. What sort of follow-up did participants request? How will you handle this?

7. How has the CFHH intervention helped your participants to know how to use their nebuliser? [Prompt: capability / skills, knowledge and beliefs]

8. How has the CFHH intervention helped your participants find ways to use their nebuliser more? [Prompt: opportunity]

9. How has the CFHH intervention helped to motivate your participants to use their nebuliser? [Prompt: motivation / confidence]

General questions:

10. How do your participants access CFHH? [Prompt: app v desktop or laptop. Have there been any issues with access for any of your participants?]

11. How engaged did participants seem with CFHH? [Prompt: What feedback if any have you had from participants about CFHH?]

12. How useful do you think CFHH is for your participants?

13. How easy / difficult has it been to get your participants to use CFHH?

14. Have you seen any changes to the ways in which your participants use their nebulisers since starting CFHH?

15. What have you learnt from using CFHH with your participants?

16. What if any are the benefits to you and / or to your participants of using CFHH?

17. How do you think CFHH fits with the other care offered by the centre?

18. How have you found being part of the trial?

*Is there anything else you’d like to say about CFHH?*

**MDT Team Member Topic guide**

Introduction to the interview: Interested in your views about CFHealthhub (CFHH) and how you think it fits with the centre and your patients:

1. Can you describe the key things you did in your centre to help patients adhere to their nebulisers prior to the ACtiF study?

2. How does nebuliser adherence fit with the other things you do for CF patients? [Prompts: ethos of centre to CF and where adherence fits in, other CF treatments e.g. exercise]

3. What involvement have you had in the CFHealthHub intervention? [Prompts: website, interventionist, training of staff]

4. How has it been for you / your centre taking part in the trial? [Prompt: recruitment to the study]

5. Do you think CFHealthHub is a useful intervention? Why? / Why not? [Prompts: what do you think about the: website, feedback about adherence data, interventionist, training?]

6. How do you think the CFHealthHub intervention is operating in practice? [Prompt: what are the strengths / improvements needed?]

7. How does the CFHealthHub intervention fit with the care offered by your centre?

8. How does the CFHealthHub intervention help your patients to know how to use their nebuliser? [Prompts: Skills / knowledge / beliefs. How / Why doesn’t it help?]

9. How does the CFHealthHub intervention help your patients to find ways to use their nebuliser more? [Prompts: How / Why doesn’t it help?]

10. How does the CFHealthHub intervention help to motivate your patients to use their nebuliser? [Prompts: How / Why doesn’t it help?]

11. Do you think CFHealthHub is helping your intervention patients to improve their adherence? If yes, what key things have helped this? If no, what if anything could be done to help this?

12. Has the CFHealthHub intervention changed anything about the way in which you and/or your team approach adherence in your centre?

i) for patients receiving the intervention?

ii) for patients not receiving the intervention?

[Prompts: MDT discussions / differences between control and intervention patients]

13. Which of your patient groups are most likely to benefit from CFHealthHub? Why?

14. Which of your patient groups are least likely to benefit from CFHealthHub? Why?

15. Would you consider continuing to use CFHealthHub in the future? Why? Why not?

16. How able do you feel to go on delivering care related to improving adherence after the study ends? [Prompt: has the study changed the way you will go about this?]

17. Are there any aspects of the research that we haven’t talked about that you’d like to comment on?

*Is there anything else you’d like to say?*

**Appendix 2: Consolidated criteria for reporting qualitative studies (COREQ): 32-item checklist – Proof Paper**

| **No.** | **Item** | **Guide questions / description** | |
| --- | --- | --- | --- |
| **Domain 1: Research team and reflexivity**  ***Personal characteristics*** | | | |
| 1. | Interviewer / facilitator | Which author/s conducted the interviews or focus group? | EL and SD |
| 2. | Credentials | What were the researcher’s credentials? E.g. PhD, MD | EL = MSC, RGN,  SD = PhD |
| 3. | Occupation | What was their occupation at the time of the study? | EL = Research Associate  SD= Research Fellow |
| 4. | Gender | Was the researcher male or female? | Females |
| 5. | Experience and training | What experience or training did the researcher have? | EL & SD both have prior qualitative research experience |
| ***Relationship with participants*** | | | |
| 6. | Relationship established | Was a relationship established prior to study commencement? | No |
| 7. | Participant knowledge of the interviewer | What did the participants know about the researcher? E.g. personal goals, reasons for doing the research | Part of study team |
| 8. | Interviewer characteristics | What characteristics were reported about the interviewer/facilitator? E.g. bias, assumptions, reasons and interests in the research topic | Both had no prior experience of Cystic Fibrosis  EL is also a nurse but does not work in this area.  SD is a health psychologist by background.  SD was involved in the intervention development. |
| **Domain 2: study design**  ***Theoretical framework*** | | | |
| 9. | Methodological orientation and theory | What methodological orientation was stated to underpin the study? E.g. grounded theory, discourse analysis, phenomenology, content analysis | Framework analysis using theoretical domains framework. |
| ***Participant selection*** | | | |
| 10. | Sampling | How were participants selected? E.g. purposive, convenience, consecutive, snowball | Purposive from 19 RCT centres. |
| 11. | Method of approach | How were participants approached? E.g. face-to-face, telephone, mail, email | Face-to-face, email, letter and telephone. |
| 12. | Sample size | How many participants were in the study? | Patients: 84 agreed to be approached for interview. Unable to contact 37, did not follow up 12 leaving sample of 35. 32 consented. Interviewed 22.  Interventionists: 26 approached and interviewed.  MDT approached 9, unable to contact 4, interviewed 5. |
| 13. | Non-participation | How many people refused to participate or dropped out? Reasons? | Patients: 3 declined, 2 were too busy one gave no reason.  3 were unwell on day of interview, 1 died, and 6 were lost to follow up. |
| ***Setting*** | | | |
| 14. | Setting of data collection | Where was the data collected? E.g. home, clinic, workplace | Patient – home or clinic; interventionists / PI – workplace or telephone. |
| 15. | Presence of non-participants | Was anyone else present besides the participants and researchers? | No |
| 16. | Description of the sample | What are the important characteristics of the sample? E.g. demographic data, date | Patients: 10 male, 12 female, aged 19-58, all deprivation levels. All adherence levels.  HCP: Range of different professions and CF experience. |
| ***Data collection*** | | | |
| 17 | Interview guide | Were questions, prompts, guides provided by the authors? Was it pilot tested? | Topic guide provided (Appendix 1) |
| 18. | Repeat interviews | Were repeat interviews carried out? If yes, how many? | No |
| 19. | Audio / visual recording | Did the research use audio or visual recording to collect the data? | Audio recording |
| 20. | Field notes | Were field notes made during and/or after the interviews? | Yes |
| 21. | Duration | What was the duration of the interviews of focus groups? | Patients = 18-83 minutes (average 42)  HCP = 39-135 minutes (average 88 ) |
| 22. | Data saturation | Was data saturation discussed? | No |
| 23. | Transcripts returned | Were transcripts returned to participants for comments and/or corrections? | No |
| **Domain 3: analysis and findings**  ***Data analysis*** | | | |
| 24. | Number of data coders | How many data coders coded the data? | Three (SD, EL, AS) |
| 25. | Description of the coding tree | Did authors provide a description of the coding tree? | Moore’s aspects of process evaluation including acceptability of intervention, description of intervention, mechanisms of action, outcomes and implementation. |
| 26. | Derivation of themes | Were themes identified in advance or derived from the data? | Both |
| 27. | Software | What software, if applicable, was used to manage the data? | N-VivoTM |
| 28. | Participant checking | Did participants provide feedback on the findings? | No (PPI only) |
| ***Reporting*** | |
| 29. | Quotations presented | Were participant quotations presented to illustrate the themes / findings? Was each quotation identified? E.g. participant number | Yes  Yes |
| 30. | Data and findings consistent | Was there consistency between the data presented and the findings? | Yes |
| 31. | Clarity of major themes | Were major themes clearly presented in the findings? | Yes |
| 32. | Clarity of minor themes | Is there a description of diverse cases or discussion of minor themes? | Yes |
